# Supplementary material for: Factors Associated with COVID-19 Vaccine Intentions among South Carolina Residents
Source: MDPI journal article supplement (doi:10.3390/vaccines10060942), 2022-06-14
Supplement: s1 [file s1]

# SC STRONG:

Table S1: Sampling and Testing Representative Outreach for Novel coronavirus Guidance

A collaboration between SC DHEC, UofSC, and community partners

Thank you for your time! This short survey should take less than 5 to 10 minutes. Please call 803-576-7378 or email [scstrong@sc.edu](mailto:scstrong@sc.edu) if you have any questions or prefer to complete this survey by phone. Your answers are confidential and will be kept private.

| Section 1: Let's get started |                                                                                                             |                                                                                                                                                                                                                                                                                                                                                                                                                                                                                                                                                                                                                  |   |   |   |   |   |
|------------------------------|-------------------------------------------------------------------------------------------------------------|------------------------------------------------------------------------------------------------------------------------------------------------------------------------------------------------------------------------------------------------------------------------------------------------------------------------------------------------------------------------------------------------------------------------------------------------------------------------------------------------------------------------------------------------------------------------------------------------------------------|---|---|---|---|---|
| No.                          | Question                                                                                                    | Response                                                                                                                                                                                                                                                                                                                                                                                                                                                                                                                                                                                                         |   |   |   |   |   |
| 1.                           | What is your unique project ID?<br>(Psst. It's on the back of your invitation letter)                       |                                                                                                                                                                                                                                                                                                                                                                                                                                                                                                                                                                                                                  |   |   |   |   |   |
| 2.                           | What is your home zip code?                                                                                 |                                                                                                                                                                                                                                                                                                                                                                                                                                                                                                                                                                                                                  |   |   |   |   |   |
| 3.                           | What is your last name?                                                                                     |                                                                                                                                                                                                                                                                                                                                                                                                                                                                                                                                                                                                                  |   |   |   |   |   |
| 4.                           | What is today's date?                                                                                       | M                                                                                                                                                                                                                                                                                                                                                                                                                                                                                                                                                                                                                | M | D | D | Y | Y |
| Section 2: Testing Behaviors |                                                                                                             |                                                                                                                                                                                                                                                                                                                                                                                                                                                                                                                                                                                                                  |   |   |   |   |   |
| No.                          | Question                                                                                                    | Response                                                                                                                                                                                                                                                                                                                                                                                                                                                                                                                                                                                                         |   |   |   |   |   |
| 5.                           | Have you ever been tested for active coronavirus infection? (nasal or saliva test)?                         | <input type="checkbox"/> Yes<br><input type="checkbox"/> No                                                                                                                                                                                                                                                                                                                                                                                                                                                                                                                                                      |   |   |   |   |   |
| 5a.                          | Have you ever tested <u>positive</u> for active coronavirus infection?                                      | <input type="checkbox"/> Yes<br><input type="checkbox"/> No                                                                                                                                                                                                                                                                                                                                                                                                                                                                                                                                                      |   |   |   |   |   |
| 5a1.                         | When was your last positive test?                                                                           | M                                                                                                                                                                                                                                                                                                                                                                                                                                                                                                                                                                                                                | M | D | D | Y | Y |
|                              |                                                                                                             | <input type="checkbox"/> I don't remember                                                                                                                                                                                                                                                                                                                                                                                                                                                                                                                                                                        |   |   |   |   |   |
| 5a2.                         | Have you experienced any long-term symptoms?                                                                | <input type="checkbox"/> Yes<br><input type="checkbox"/> No                                                                                                                                                                                                                                                                                                                                                                                                                                                                                                                                                      |   |   |   |   |   |
| 5a3.                         | Which of the following long-term symptoms did you experience? (please check all that apply)                 | <input type="checkbox"/> Muscle weakness<br><input type="checkbox"/> Respiratory issues (e.g., shortness of breath, difficulty breathing, or persistent cough)<br><input type="checkbox"/> Lost or distorted senses of smell and/or taste<br><input type="checkbox"/> Neurological problems (e.g., fatigue, brain fog, or headaches)<br><input type="checkbox"/> Difficulty sleeping<br><input type="checkbox"/> Mental health issues (e.g., anxiety or depression)<br><input type="checkbox"/> Other (specify _____)<br><input type="checkbox"/> None of the above- I did not experience any long-term symptoms |   |   |   |   |   |
| 5a4.                         | Overall, about how long did you experience symptoms for? (including both short term and long term symptoms) | <input type="checkbox"/> Two weeks<br><input type="checkbox"/> One month<br><input type="checkbox"/> Two months<br><input type="checkbox"/> Three months or longer<br><input type="checkbox"/> Other (specify _____)<br><input type="checkbox"/> None of the above- I was asymptomatic.                                                                                                                                                                                                                                                                                                                          |   |   |   |   |   |

|      |                                                                                              |                                                                                                                                                                                                                                                                                                                                                                     |   |   |   |   |   |   |   |   |
|------|----------------------------------------------------------------------------------------------|---------------------------------------------------------------------------------------------------------------------------------------------------------------------------------------------------------------------------------------------------------------------------------------------------------------------------------------------------------------------|---|---|---|---|---|---|---|---|
| 5b.  | How often have you been tested for active coronavirus infection?                             | <input type="checkbox"/> 1 time<br><input type="checkbox"/> 2-5 times<br><input type="checkbox"/> 6 or more times                                                                                                                                                                                                                                                   |   |   |   |   |   |   |   |   |
| 5c.  | Where have you gone for testing?<br><i>Select all that apply.</i>                            | <input type="checkbox"/> Doctor's office<br><input type="checkbox"/> Community pop-up or drive-up testing site<br><input type="checkbox"/> Other: _____                                                                                                                                                                                                             |   |   |   |   |   |   |   |   |
| 5d.  | Why did you seek testing?                                                                    | <input type="checkbox"/> Close contact tested positive<br><input type="checkbox"/> Concern due to high cases in your community<br><input type="checkbox"/> Had coronavirus-like symptoms<br><input type="checkbox"/> Curious if you were positive<br><input type="checkbox"/> Other: _____                                                                          |   |   |   |   |   |   |   |   |
| 6.   | Have you ever been tested for coronavirus antibodies (blood test)?                           | <input type="checkbox"/> Yes<br><input type="checkbox"/> No                                                                                                                                                                                                                                                                                                         |   |   |   |   |   |   |   |   |
| 6a.  | Have you ever tested <u>positive</u> for coronavirus antibodies?                             | <input type="checkbox"/> Yes<br><input type="checkbox"/> No                                                                                                                                                                                                                                                                                                         |   |   |   |   |   |   |   |   |
| 6a1. | When was your last positive antibody test?                                                   | <table border="1" style="display: inline-table;"> <tr> <td>M</td><td>M</td><td>D</td><td>D</td><td>Y</td><td>Y</td><td>Y</td><td>Y</td> </tr> </table> <input type="checkbox"/> I don't remember                                                                                                                                                                    | M | M | D | D | Y | Y | Y | Y |
| M    | M                                                                                            | D                                                                                                                                                                                                                                                                                                                                                                   | D | Y | Y | Y | Y |   |   |   |
| 7.   | Have you ever <u>NOT</u> sought testing for any reason?<br><br><i>Select all that apply.</i> | <input type="checkbox"/> No/Does not apply<br><input type="checkbox"/> Did not have transportation<br><input type="checkbox"/> Could not pay for the test<br><input type="checkbox"/> Inconvenient location<br><input type="checkbox"/> Inconvenient times and/or dates<br><input type="checkbox"/> Discomfort of the test<br><input type="checkbox"/> Other: _____ |   |   |   |   |   |   |   |   |

### Section 3: COVID-19 Vaccine

| No. | Question                                                                                                                                                             | Response                                                                                                                                                                                                                                                                                             |
|-----|----------------------------------------------------------------------------------------------------------------------------------------------------------------------|------------------------------------------------------------------------------------------------------------------------------------------------------------------------------------------------------------------------------------------------------------------------------------------------------|
| 8.  | How do you feel about the following statements?                                                                                                                      |                                                                                                                                                                                                                                                                                                      |
| 8a. | I think the COVID-19 vaccines are safe                                                                                                                               | <input type="checkbox"/> Agree<br><input type="checkbox"/> Neutral<br><input type="checkbox"/> Disagree                                                                                                                                                                                              |
| 8b. | I think the COVID-19 vaccines are effective                                                                                                                          | <input type="checkbox"/> Agree<br><input type="checkbox"/> Neutral<br><input type="checkbox"/> Disagree                                                                                                                                                                                              |
| 8c. | I feel confident in the research process by the pharmaceutical companies that led to the design and development of the COVID-19 vaccines                             | <input type="checkbox"/> Agree<br><input type="checkbox"/> Neutral<br><input type="checkbox"/> Disagree                                                                                                                                                                                              |
| 8d. | I feel confident in the regulatory approval process by the US Food and Drug Administration (FDA) that led to the currently available COVID-19 vaccines on the market | <input type="checkbox"/> Agree<br><input type="checkbox"/> Neutral<br><input type="checkbox"/> Disagree                                                                                                                                                                                              |
| 9.  | What are your motivations for taking the COVID-19 vaccine? (please check all that apply)                                                                             | <input type="checkbox"/> I do not plan to take the vaccine<br><input type="checkbox"/> Protecting a family or close friend that is high-risk for severe disease<br><input type="checkbox"/> Protecting myself<br><input type="checkbox"/> Concerned about possible virus exposures at work or school |

|       |                                                                                           |                                                                                                                                                                                                                                                                                                                                                                                                                                                                                                                                                                                                                                                                                                                                  |
|-------|-------------------------------------------------------------------------------------------|----------------------------------------------------------------------------------------------------------------------------------------------------------------------------------------------------------------------------------------------------------------------------------------------------------------------------------------------------------------------------------------------------------------------------------------------------------------------------------------------------------------------------------------------------------------------------------------------------------------------------------------------------------------------------------------------------------------------------------|
|       |                                                                                           | <input type="checkbox"/> Concerned about possible virus exposures in my community<br><input type="checkbox"/> Doing my part to help control the pandemic<br><input type="checkbox"/> Serving as an example to encourage others to take the vaccine                                                                                                                                                                                                                                                                                                                                                                                                                                                                               |
| 10.   | What are possible barriers for taking the COVID-19 vaccine? (please check all that apply) | <input type="checkbox"/> I do not believe I need it because I already had COVID-19 infection<br><input type="checkbox"/> Personal, religious, or cultural beliefs against COVID-19 vaccine<br><input type="checkbox"/> I am immunocompromised or pregnant<br><input type="checkbox"/> I do not think the vaccine is safe or effective<br><input type="checkbox"/> I do not know where to go to get the vaccine<br><input type="checkbox"/> I do not have time to take the vaccine<br><input type="checkbox"/> I do not have the money or transportation to get the vaccine<br><input type="checkbox"/> I have a fear of needles<br><input type="checkbox"/> I am not comfortable being one of the first people to get vaccinated |
| 11.   | Have you had the COVID-19 vaccine?                                                        | <input type="checkbox"/> Yes<br><input type="checkbox"/> No                                                                                                                                                                                                                                                                                                                                                                                                                                                                                                                                                                                                                                                                      |
| 11A.  | If yes, What as the date of your first vaccination?                                       | (calendar or date formatted answer)                                                                                                                                                                                                                                                                                                                                                                                                                                                                                                                                                                                                                                                                                              |
| 11Ai  | What as the date of your last vaccination?                                                | (calendar or date formatted answer)                                                                                                                                                                                                                                                                                                                                                                                                                                                                                                                                                                                                                                                                                              |
| 11Aii | Who was the manufacturer of your COVID-19 vaccine?                                        | <input type="checkbox"/> Pfizer<br><input type="checkbox"/> Moderna<br><input type="checkbox"/> Johnson and Johnson (Jenssen)<br><input type="checkbox"/> I do not know<br><input type="checkbox"/> Other                                                                                                                                                                                                                                                                                                                                                                                                                                                                                                                        |
| 11B.  | If no, Do you plan to take the COVID-19 vaccine?                                          | <input type="checkbox"/> Yes<br><input type="checkbox"/> No                                                                                                                                                                                                                                                                                                                                                                                                                                                                                                                                                                                                                                                                      |
| 11Bi. | If yes, when do you plan to take the COVID-19 vaccine?                                    | <input type="checkbox"/> In the next few weeks<br><input type="checkbox"/> I plan to wait for a while<br><input type="checkbox"/> Other (specify _____)                                                                                                                                                                                                                                                                                                                                                                                                                                                                                                                                                                          |
| 12.   | Do you have any additional thoughts or comments regarding the COVID-19 vaccine?           | (open ended)                                                                                                                                                                                                                                                                                                                                                                                                                                                                                                                                                                                                                                                                                                                     |

#### Section 4: Daily behaviors

| No. | Question                                                                               | Response                                                                                                                                                                                             |
|-----|----------------------------------------------------------------------------------------|------------------------------------------------------------------------------------------------------------------------------------------------------------------------------------------------------|
| 13. | In the <u>past two weeks</u> , how often have you practiced social distancing?         | <input type="checkbox"/> Never<br><input type="checkbox"/> Rarely<br><input type="checkbox"/> Some of the time<br><input type="checkbox"/> Most of the time<br><input type="checkbox"/> All the time |
| 14. | In the <u>past two weeks</u> , how often do you wear a face covering when not at home? | <input type="checkbox"/> Never<br><input type="checkbox"/> Rarely<br><input type="checkbox"/> Some of the time<br><input type="checkbox"/> Most of the time<br><input type="checkbox"/> All the time |

|     |                                                                                                                                                                                                                              |                                                                                                                                                                                                                                                                                                                                                                                                                                                                                                                                                                                                                                                           |
|-----|------------------------------------------------------------------------------------------------------------------------------------------------------------------------------------------------------------------------------|-----------------------------------------------------------------------------------------------------------------------------------------------------------------------------------------------------------------------------------------------------------------------------------------------------------------------------------------------------------------------------------------------------------------------------------------------------------------------------------------------------------------------------------------------------------------------------------------------------------------------------------------------------------|
| 15. | In the <u>past two weeks</u> , have you self-isolated or quarantined?                                                                                                                                                        | <input type="checkbox"/> Yes<br><input type="checkbox"/> No                                                                                                                                                                                                                                                                                                                                                                                                                                                                                                                                                                                               |
| 16. | In the <u>past two weeks</u> , how often have you felt stressed, nervous, anxious, or on edge?                                                                                                                               | <input type="checkbox"/> Never<br><input type="checkbox"/> Rarely<br><input type="checkbox"/> Some of the time<br><input type="checkbox"/> Most of the time<br><input type="checkbox"/> All the time<br><input type="checkbox"/> Prefer not to answer                                                                                                                                                                                                                                                                                                                                                                                                     |
| 17. | In the <u>past two weeks</u> , how often have you felt sad, lonely, or depressed?                                                                                                                                            | <input type="checkbox"/> Never<br><input type="checkbox"/> Rarely<br><input type="checkbox"/> Some of the time<br><input type="checkbox"/> Most of the time<br><input type="checkbox"/> All the time<br><input type="checkbox"/> Prefer not to answer                                                                                                                                                                                                                                                                                                                                                                                                     |
| 18. | In the <u>past two weeks</u> , how often have you had physical reactions (e.g. sweating, trouble breathing, nausea, or a pounding heart) when thinking about your experience with the novel coronavirus (COVID-19) pandemic? | <input type="checkbox"/> Never<br><input type="checkbox"/> Rarely<br><input type="checkbox"/> Some of the time<br><input type="checkbox"/> Most of the time<br><input type="checkbox"/> All the time<br><input type="checkbox"/> Prefer not to answer                                                                                                                                                                                                                                                                                                                                                                                                     |
| 19. | In the <u>past month</u> , were you or your family worried about not having enough food to eat due to a lack of money or other resources?                                                                                    | <input type="checkbox"/> Yes<br><input type="checkbox"/> No<br><input type="checkbox"/> Prefer not to answer                                                                                                                                                                                                                                                                                                                                                                                                                                                                                                                                              |
| 20. | In the <u>past month</u> , did you or your family go without eating due to a lack of money or other resources?                                                                                                               | <input type="checkbox"/> Yes<br><input type="checkbox"/> No<br><input type="checkbox"/> Prefer not to answer                                                                                                                                                                                                                                                                                                                                                                                                                                                                                                                                              |
| 21. | What have you done to cope with your stress related to the COVID-19 outbreak? (please check all that apply)                                                                                                                  | <input type="checkbox"/> Meditation and/or mindfulness practices<br><input type="checkbox"/> Talking with friends and family and/or engaging in more family activities<br><input type="checkbox"/> Increased television watching or other "screen time" activities (e.g., video games, social media)<br><input type="checkbox"/> Drinking alcohol<br><input type="checkbox"/> Using tobacco<br><input type="checkbox"/> Using marijuana<br><input type="checkbox"/> Talking to my healthcare providers more frequently, including mental healthcare provider (e.g., therapist, psychologist, counselor)<br><input type="checkbox"/> Other (specify _____) |

#### Section 5: COVID-19 Risk Perception

| No  | Question                                                                                             | Response                                                                                                                                                               |
|-----|------------------------------------------------------------------------------------------------------|------------------------------------------------------------------------------------------------------------------------------------------------------------------------|
| 21. | How concerned are you about yourself or someone in your household getting infected with coronavirus? | <input type="checkbox"/> Not concerned<br><input type="checkbox"/> A little concerned<br><input type="checkbox"/> Concerned<br><input type="checkbox"/> Very concerned |
| 22. | Have any of your close family or friends had or have coronavirus (COVID-19)?                         | <input type="checkbox"/> Yes<br><input type="checkbox"/> No<br><input type="checkbox"/> Don't know                                                                     |

|     |                                                                                                       |                                                                                                                                                                        |
|-----|-------------------------------------------------------------------------------------------------------|------------------------------------------------------------------------------------------------------------------------------------------------------------------------|
| 23. | How concerned are you about the spread of coronavirus (COVID-19) in your community <u>right now</u> ? | <input type="checkbox"/> Not concerned<br><input type="checkbox"/> A little concerned<br><input type="checkbox"/> Concerned<br><input type="checkbox"/> Very concerned |
|-----|-------------------------------------------------------------------------------------------------------|------------------------------------------------------------------------------------------------------------------------------------------------------------------------|

#### Section 6: Parenting

| No. | Question                                                                                                            | Response                                                                                                                                                                                                                                                                                                                                                                                                                                                                                                     |
|-----|---------------------------------------------------------------------------------------------------------------------|--------------------------------------------------------------------------------------------------------------------------------------------------------------------------------------------------------------------------------------------------------------------------------------------------------------------------------------------------------------------------------------------------------------------------------------------------------------------------------------------------------------|
| 24  | Are you a parent to a child under the age of 18 years?                                                              | <input type="checkbox"/> Yes<br><input type="checkbox"/> No                                                                                                                                                                                                                                                                                                                                                                                                                                                  |
| 24a | How many children under the age of 18 years live in your household?                                                 | _____                                                                                                                                                                                                                                                                                                                                                                                                                                                                                                        |
| 24b | What are their ages                                                                                                 |                                                                                                                                                                                                                                                                                                                                                                                                                                                                                                              |
| 24c | Do any of the following situations apply to your children?                                                          | <input type="checkbox"/> None<br><input type="checkbox"/> Plan to put them in a summer camp<br><input type="checkbox"/> Has been enrolled in K-12 face-to-face since January 2021<br><input type="checkbox"/> Has been enrolled in K-12 hybrid since January 2021<br><input type="checkbox"/> Has been enrolled in K-12 virtual since January 2021<br><input type="checkbox"/> Has been attending daycare<br><input type="checkbox"/> Has been attending after school program or extra-curricular activities |
| 25  | Have any of your children been exposed to coronavirus infection at school/daycare/after school program?             | <input type="checkbox"/> Yes (describe exposure _____)<br><input type="checkbox"/> No                                                                                                                                                                                                                                                                                                                                                                                                                        |
| 25a | If yes, how many notifications of potential COVID-19 exposure have you received in the 2020-2021 school year?       | <input type="checkbox"/> <5 times<br><input type="checkbox"/> 5-10 times<br><input type="checkbox"/> More than 10 times<br><input type="checkbox"/> Don't know                                                                                                                                                                                                                                                                                                                                               |
| 25b | Have any of your children had to quarantine at home due to a school/daycare/after school-related COVID-19 exposure? | <input type="checkbox"/> Yes<br><input type="checkbox"/> No                                                                                                                                                                                                                                                                                                                                                                                                                                                  |
| 27  | Have any of your children ever tested <u>positive</u> for active coronavirus infection?                             | <input type="checkbox"/> Yes (specify how many _____)<br><input type="checkbox"/> No                                                                                                                                                                                                                                                                                                                                                                                                                         |
| 28  | Do any children in your household have a high risk medical condition?                                               | <input type="checkbox"/> Yes (describe _____)<br><input type="checkbox"/> No                                                                                                                                                                                                                                                                                                                                                                                                                                 |
| 29  | Regarding vaccination for your children, do any of these apply.<br><br>Select all that apply                        | <input type="checkbox"/> I plan to vaccinate my 6 month – 2 year old when eligible<br><input type="checkbox"/> I plan to vaccinate my 2-5 year old when eligible<br><input type="checkbox"/> I plan to vaccinate my 5-11 year old when eligible<br><input type="checkbox"/> I plan to vaccinate my 12-15 year old when eligible<br><input type="checkbox"/> I plan to vaccinate my 16+ year old                                                                                                              |

#### Section 7: Almost done! Please tell us a little about yourself.

| No. | Question                                                               | Response                                                                                                                                                                                                                                      |
|-----|------------------------------------------------------------------------|-----------------------------------------------------------------------------------------------------------------------------------------------------------------------------------------------------------------------------------------------|
| 30. | Do any of these situations apply to you?<br><br>Select all that apply. | <input type="checkbox"/> None<br><input type="checkbox"/> I live in a nursing home, rehabilitation center, or long-term care facility<br><input type="checkbox"/> I work in a nursing home, rehabilitation center, or long-term care facility |

|     |                                                                                                                                      |                                                                                                                                                                                                                                                                                                                                                                                                                                                                                                                          |
|-----|--------------------------------------------------------------------------------------------------------------------------------------|--------------------------------------------------------------------------------------------------------------------------------------------------------------------------------------------------------------------------------------------------------------------------------------------------------------------------------------------------------------------------------------------------------------------------------------------------------------------------------------------------------------------------|
|     |                                                                                                                                      | <input type="checkbox"/> I am a front-line medical care worker<br><input type="checkbox"/> I am an essential worker (specify) _____                                                                                                                                                                                                                                                                                                                                                                                      |
| 31. | Do you have any health problems?<br><br><i>Select all that apply.</i>                                                                | <input type="checkbox"/> None<br><input type="checkbox"/> Asthma<br><input type="checkbox"/> Sickle cell disease<br><input type="checkbox"/> Lung disease (COPD, emphysema, etc)<br><input type="checkbox"/> Heart disease<br><input type="checkbox"/> Blood clotting disorder<br><input type="checkbox"/> Diabetes<br><input type="checkbox"/> High blood pressure (hypertension)<br><input type="checkbox"/> Immunocompromising condition (HIV, Lupus, cancer treatment, etc)<br><input type="checkbox"/> Other: _____ |
| 32. | In the <u>past two weeks</u> , have you experienced any of the following symptoms?<br><br><i>Select all that apply.</i>              | <input type="checkbox"/> None, I feel healthy<br><input type="checkbox"/> Fever<br><input type="checkbox"/> Cough<br><input type="checkbox"/> Shortness of breath or difficulty breathing<br><input type="checkbox"/> Chest pain<br><input type="checkbox"/> Rapid heart rate or fast heartbeat<br><input type="checkbox"/> Muscle or body aches<br><input type="checkbox"/> Loss of taste<br><input type="checkbox"/> Loss of smell<br><input type="checkbox"/> Other (specify) _____                                   |
| 33. | How many people live in your home, including you?<br><i>Please count anyone who sleeps in your home for 4 nights or more a week.</i> | <div style="border: 1px solid black; width: 40px; height: 20px; display: inline-block;"></div> <div style="border: 1px solid black; width: 40px; height: 20px; display: inline-block;"></div>                                                                                                                                                                                                                                                                                                                            |
| 34. | How tall are you?                                                                                                                    | ___ feet ___ inches                                                                                                                                                                                                                                                                                                                                                                                                                                                                                                      |
| 35. | How much do you weigh?                                                                                                               | _____ lbs                                                                                                                                                                                                                                                                                                                                                                                                                                                                                                                |
| 36. | What is your age range?                                                                                                              | <input type="checkbox"/> <18 years old<br><input type="checkbox"/> 18-29 years old<br><input type="checkbox"/> 30-39 years old<br><input type="checkbox"/> 40-49 years old<br><input type="checkbox"/> 50-59 years old<br><input type="checkbox"/> 60-69 years old<br><input type="checkbox"/> 70+ years old                                                                                                                                                                                                             |
| 37. | What is(are) your race/ethnicity(ies)?<br><br><i>Select all that apply.</i>                                                          | <input type="checkbox"/> Hispanic/Latinx<br><input type="checkbox"/> White/Caucasian<br><input type="checkbox"/> Black/African American<br><input type="checkbox"/> Asian American<br><input type="checkbox"/> Native American/American Indian<br><input type="checkbox"/> Other (specify) _____<br><input type="checkbox"/> Prefer not to say                                                                                                                                                                           |
| 38. | How do you define your gender?                                                                                                       | <input type="checkbox"/> Female<br><input type="checkbox"/> Male<br><input type="checkbox"/> Non-binary/third gender<br><input type="checkbox"/> Transgender<br><input type="checkbox"/> Prefer to self-describe _____<br><input type="checkbox"/> Prefer not to say                                                                                                                                                                                                                                                     |
| 39. | What was your household income last year?                                                                                            | <input type="checkbox"/> Less than \$15,000<br><input type="checkbox"/> \$15,000 to \$34,999                                                                                                                                                                                                                                                                                                                                                                                                                             |

|                                                                                                                  |                                                                                 | <input type="checkbox"/> \$35,000 to \$49,999<br><input type="checkbox"/> \$50,000 to \$74,999<br><input type="checkbox"/> \$75,000 to \$99,999<br><input type="checkbox"/> \$100,000 to \$149,999<br><input type="checkbox"/> More than \$150,000<br><input type="checkbox"/> Prefer not to say                                                                                                                                                                                                                                                                                                                                                                                                                                                          |
|------------------------------------------------------------------------------------------------------------------|---------------------------------------------------------------------------------|-----------------------------------------------------------------------------------------------------------------------------------------------------------------------------------------------------------------------------------------------------------------------------------------------------------------------------------------------------------------------------------------------------------------------------------------------------------------------------------------------------------------------------------------------------------------------------------------------------------------------------------------------------------------------------------------------------------------------------------------------------------|
| <b>Section 8: Vaccine hesitancy, medical mistrust, and information sources. Again, this survey is anonymous.</b> |                                                                                 |                                                                                                                                                                                                                                                                                                                                                                                                                                                                                                                                                                                                                                                                                                                                                           |
| No.                                                                                                              | Question                                                                        | Response                                                                                                                                                                                                                                                                                                                                                                                                                                                                                                                                                                                                                                                                                                                                                  |
| 40.                                                                                                              | How do you feel about the following statements?                                 |                                                                                                                                                                                                                                                                                                                                                                                                                                                                                                                                                                                                                                                                                                                                                           |
| 40a.                                                                                                             | A lot of information about COVID-19 is being held back by the government.       | <input type="checkbox"/> Agree<br><input type="checkbox"/> Neutral<br><input type="checkbox"/> Disagree                                                                                                                                                                                                                                                                                                                                                                                                                                                                                                                                                                                                                                                   |
| 40b.                                                                                                             | The government cannot be trusted to tell the truth about COVID-19.              | <input type="checkbox"/> Agree<br><input type="checkbox"/> Neutral<br><input type="checkbox"/> Disagree                                                                                                                                                                                                                                                                                                                                                                                                                                                                                                                                                                                                                                                   |
| 40c.                                                                                                             | People should be suspicious of information from the government about COVID-19.  | <input type="checkbox"/> Agree<br><input type="checkbox"/> Neutral<br><input type="checkbox"/> Disagree                                                                                                                                                                                                                                                                                                                                                                                                                                                                                                                                                                                                                                                   |
| 40d.                                                                                                             | When it comes to COVID-19, people cannot trust health care providers.           | <input type="checkbox"/> Agree<br><input type="checkbox"/> Neutral<br><input type="checkbox"/> Disagree                                                                                                                                                                                                                                                                                                                                                                                                                                                                                                                                                                                                                                                   |
| 40e.                                                                                                             | When it comes to COVID-19, doctors have the best interests of patients in mind. | <input type="checkbox"/> Agree<br><input type="checkbox"/> Neutral<br><input type="checkbox"/> Disagree                                                                                                                                                                                                                                                                                                                                                                                                                                                                                                                                                                                                                                                   |
| 41.                                                                                                              | Where did you get your information about COVID-19? (select all that apply)      | <input type="checkbox"/> Service providers or health professionals<br><input type="checkbox"/> News websites or apps<br><input type="checkbox"/> Announcements or news conferences held by local public health officials or agencies<br><input type="checkbox"/> Announcements or news conferences held by local government officials (e.g., a mayor or governor)<br><input type="checkbox"/> TV or radio<br><input type="checkbox"/> Social media<br><input type="checkbox"/> People I know, such as friends, family, neighbors, or coworkers<br><input type="checkbox"/> Briefings from the federal government, including the President of the United States<br><input type="checkbox"/> Social media<br><input type="checkbox"/> Other (specify) _____ |
| <b>Thank you for your time! Is there anything else you would like to tell us?</b>                                |                                                                                 |                                                                                                                                                                                                                                                                                                                                                                                                                                                                                                                                                                                                                                                                                                                                                           |
